# Supplementary material for: Air-Filled Microbubbles Based on Albumin Functionalized with Gold Nanocages and Zinc Phthalocyanine for Multimodal Imaging
Source: MDPI journal article supplement (doi:10.3390/mi12101161), 2021-09-27
Supplement: s1 [file s1]

# Supplementary Materials: Air-Filled Microbubbles Based on Albumin Functionalized with Gold Nanocages and Zinc Phthalocyanine for Multimodal Imaging

Elizaveta A. Maksimova <sup>1</sup>, Roman A. Barmin <sup>1</sup>, Polina G. Rudakovskaya <sup>1</sup>, Olga A. Sindeeva <sup>1</sup>, Ekaterina S. Prikhodzhenko <sup>2</sup>, Alexey M. Yashchenok <sup>1</sup>, Boris N. Khlebtsov <sup>3</sup>, Alexander A. Solovov <sup>4</sup>, Gaoshan Huang <sup>4</sup>, Yongfeng Mei <sup>4</sup>, Krishna Kanti Dey <sup>5</sup> and Dmitry A. Gorin <sup>1,\*</sup>

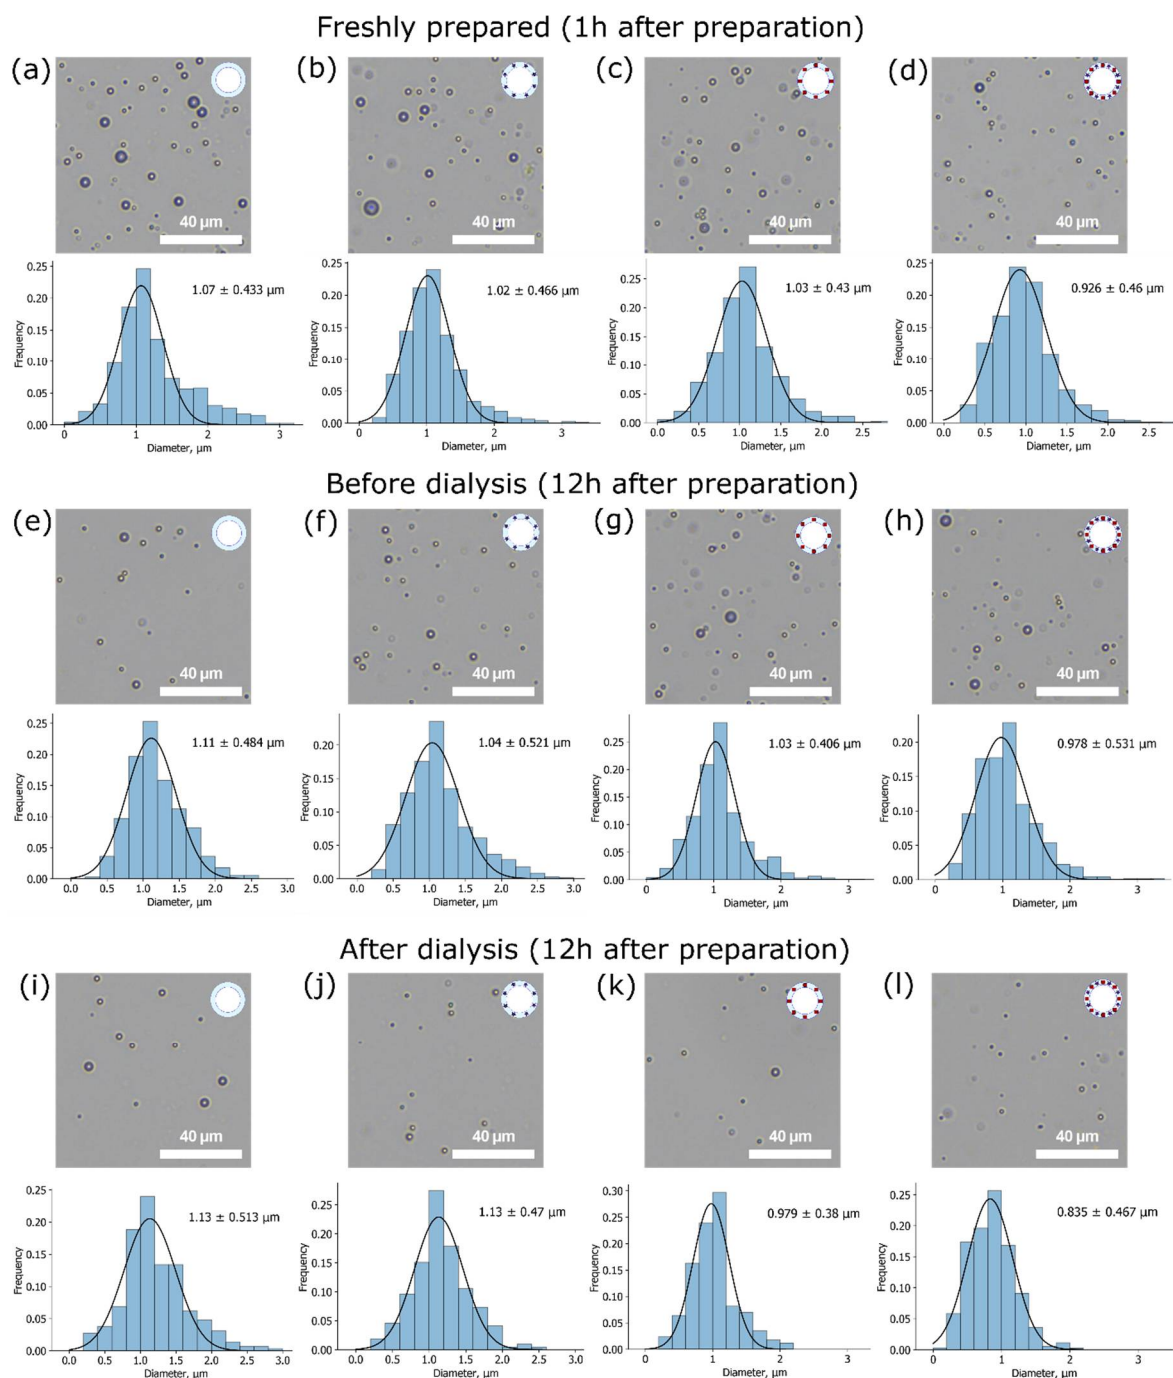

**Figure S1.** Optical microscopy (OM) images and microbubbles size distributions of freshly prepared MBs (upper panel): (a) BSA MBs, (b) BSA-ZnPc MBs, (c) BSA-Au MBs, (d) BSA-Au-ZnPc MBs; 12 hours after the preparation (middle panel):

(e) BSA MBs, (f) BSA-ZnPc MBs, (g) BSA-Au MBs, (h) BSA-Au-ZnPc MBs; after 12 hours of dialysis: (i) BSA MBs, (j) BSA-ZnPc MBs, (k) BSA-Au MBs, (l) BSA-Au-ZnPc MBs.

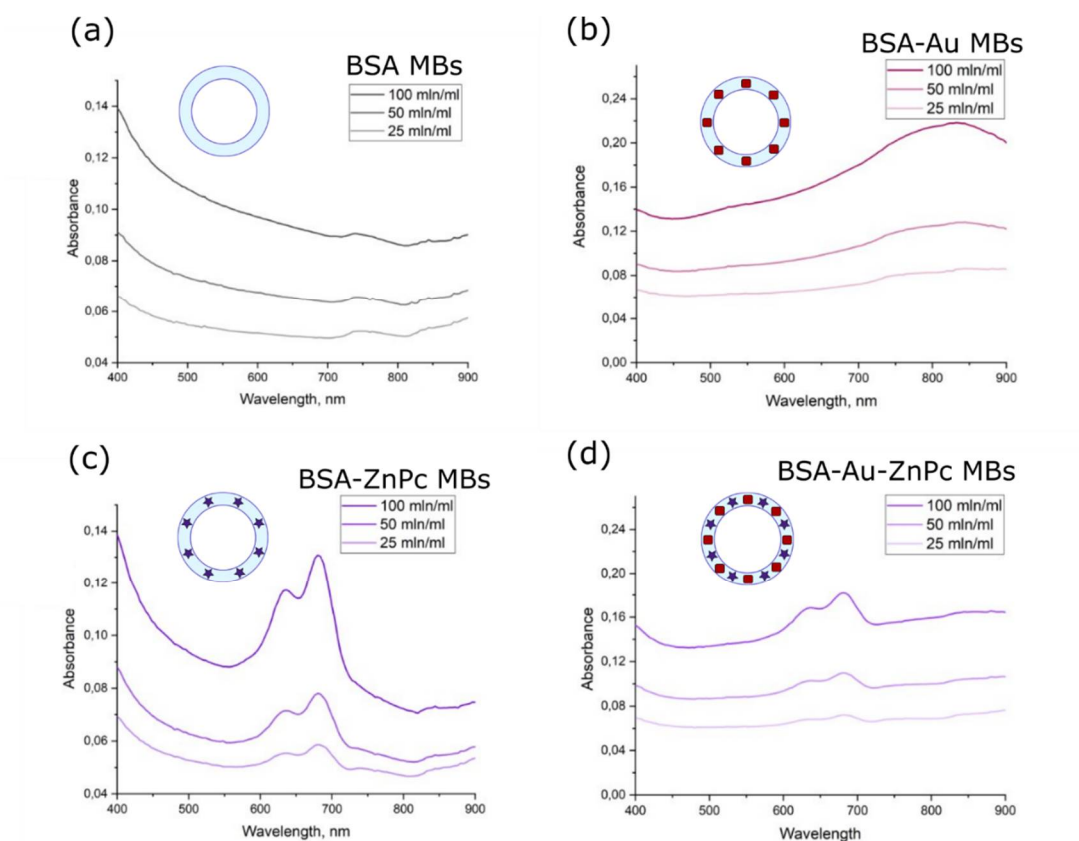

**Figure S2.** The extinction spectra of the freshly prepared MBs in the concentrations of 100, 50 and 25 million of MBs per mL: (a) BSA MBs, (b) BSA-Au MBs, (c) BSA-Zn MBs; (d) BSA-Au-ZnPc MBs.
